# Supplementary material for: Bacterial genome engineering using CRISPR-associated transposases
Source: Nat Protoc. Author manuscript; Available in PMC 2025 Jan 6. (PMC11702153; doi:10.1038/s41596-023-00927-3)
Supplement: 2024_Gelsinger_Nature Protocols_SupplementaryTables.xlsx [file NIHMS2043392-supplement-2024_Gelsinger_Nature_Protocols_SupplementaryTables_xlsx.xlsx]

## Sheet: Supplementary Table 1 
	Gelsinger et al.
	Supplementary Table 1 | Description and sequence of plasmids available.
	Plasmids Available on Addgene
	Plasmid ID	Addgene ID	System	Description	Notes	Antibiotic Selection	Plasmid Sequence
	pSL1142	160730	I-F	pBBR1-pSPIN VchCAST	Single-plasmid, broad-host, conjugation	Kanamycin	CATTTATATTCCCCAGAACATCAGGTTAATGGCGTTTTTGATGTCATTTTCGCGGTGGCTGAGATCAGCCACTTCTTCCCCGATAACGGAGACCGGCACACTGGCCATATCGGTGGTCATCATGCGCCAGCTTTCATCCCCGATATGCACCACCGGGTAAAGTTCACGGGAGACTTTATCTGACAGCAGACGTGCACTGGCCAGGGGGATCACCATCCGTCGCCCCGGCGTGTCAATAATATCACTCTGTACATCCACAAACAGACGATAACGGCTCTCTCTTTTATAGGTGTAAACCTTAAACTGCCGTACGTATAGGCTGCGCAACTGTTGGGAAGGGCGATCGGTGCGGGCCTCTTCGCTATTACGCCAGCTGGCGAAAGGGGGATGTGCTGCAAG…
	pSL1425	160735	I-F	pCDF-pSPIN VchCAST	Single-plasmid, E. coli hosts	Spectinomycin	GACGGATCGGGAGATCTCCCGATCCCCTATGGTGCACTCTCAGTACAATCTGCTCTGATGCCGCATAGTTAAGCCAGTATCTGCTCCCTGCTTGTGTGTTGGAGGTCGCTGAGTAGTGCGCGAGCAAAATTTAAGCTACAACAAGGCAAGGCTTGACCGACAATTGCATGAAGAATCTGCTTAGGGTTAGGCGTTTTGCGCTGCTTCGCGATGTACGGGCCAGATATACGCGTTGACATTGATTATTGACTAGTTATTAATAGTAATCAATTACGGGGTCATTAGTTCATAGCCCATATATGGAGTTCCGCGTTACATAACTTACGGTAAATGGCCCGCCTGGCTGACCGCCCAACGACCCCCGCCCATTGACGTCAATAATGACGTATGTTCCCATAG…
	pSL1521	160729	I-F	pSC101*-pSPIN VchCAST	Single-plasmid, temperature-sensitive, E. coli hosts	Spectinomycin	GACGGATCGGGAGATCTCCCGATCCCCTATGGTCGACTCTCAGTACAATCTGCTCTGATGCCGCATAGTTAAGCCAGTATCTGCTCCCTGCTTGTGTGTTGGAGGTCGCTGAGTAGTGCGCGAGCAAAATTTAAGCTACAACAAGGCAAGGCTTGACCGACAATTGCATGAAGAATCTGCTTAGGGTTAGGCGTTTTGCGCTGCTTCGCGATGTACGGGCCAGATATACGCGAGGGCCTATTTCCCATGATTCCTTCATATTTGCATATACGATACAAGGCTGTTAGAGAGATAATTAGAATTAATTTGACTGTAAACACAAAGATATTAGTACAAAATACGTGACGTAGAAAGTAATAATTTCTTGGGTAGTTTGCAGTTTTAAAATTATGTTTTAAA…
	pSL1765	160734	I-F	pBBBR1-pSPIN-R VchCAST	Single-plasmid, broad-host, conjugation, low self-targeting	Kanamycin	GACGGATCGGGAGATCTCCCGATCCCCTATGGTCGACTCTCAGTACAATCTGCTCTGATGCCGCATAGTTAAGCCAGTATCTGCTCCCTGCTTGTGTGTTGGAGGTCGCTGAGTAGTGCGCGAGCAAAATTTAAGCTACAACAAGGCAAGGCTTGACCGACAATTGCATGAAGAATCTGCTTAGGGTTAGGCGTTTTGCGCTGCTTCGCGATGTACGGGCCAGATATACGCGAGGGCCTATTTCCCATGATTCCTTCATATTTGCATATACGATACAAGGCTGTTAGAGAGATAATTAGAATTAATTTGACTGTAAACACAAAGATATTAGTACAAAATACGTGACGTAGAAAGTAATAATTTCTTGGGTAGTTTGCAGTTTTAAAATTATGTTTTAAA…
	pSL1777	160731	I-F	pCDF-pEffector VchCAST	pEffector plasmid, E. coli hosts, use with pDonor	Spectinomycin	CTTCGGAAAAAGAGTTGGTAGCTCTTGATCCGGCAAACAAACCACCGCTGGTAGCGGTGGTTTTTTTGTTTGCAAGCAGCAGATTACGCGCAGAAAAAAAGGATCTCAAGAAGATCCTTTGATCTTTTCTACGGGGTCTGACGCTCAGTGGAACGAAAACTCACGTTAAGGGATTTTGGTCATGAGATTATCAAAAAGGATCTTCACCTAGATCCTTTTAAATTAAAAATGAAGTTTTAAATCAATCTAAAGTATATATGAGTAAACTTGGTCTGACAGTTACCAATGCTTAATCAGTGAGGCACCTATCTCAGCGATCTGTCTATTTCGTTCATCCATAGTTGCCTGACTCCCCGTCGTGTAGATAACTACGATACGGGAGGGCTTACCATCTGGCCC…
	pSL1119	160732	I-F	pUC19-pDonor VchCAST	pDonor plasmid, E. coli hosts, use with pEffector	Ampicillin	CTTCGGAAAAAGAGTTGGTAGCTCTTGATCCGGCAAACAAACCACCGCTGGTAGCGGTGGTTTTTTTGTTTGCAAGCAGCAGATTACGCGCAGAAAAAAAGGATCTCAAGAAGATCCTTTGATCTTTTCTACGGGGTCTGACGCTCAGTGGAACGAAAACTCACGTTAAGGGATTTTGGTCATGAGATTATCAAAAAGGATCTTCACCTAGATCCTTTTAAATTAAAAATGAAGTTTTAAATCAATCTAAAGTATATATGAGTAAACTTGGTCTGACAGTTACCAATGCTTAATCAGTGAGGCACCTATCTCAGCGATCTGTCTATTTCGTTCATCCATAGTTGCCTGACTCCCCGTCGTGTAGATAACTACGATACGGGAGGGCTTACCATCTGGCCC…

## Sheet: Supplementary Table 2
	Gelsinger et al.
	Supplementary Table 2 | Primers for PCR, cloning, and qPCR.
	Primers for PCR, cloning, and qPCR
	Primer Name	Sequence	Description	Step	Notes
	VchCAST_spacer_fw, Oligo-1	ATAAC(N-32)G	For ligating an oligoduplex spacer sequence into BsaI-digested entry vector to generate a new VchCAST CRISPR array. [N32] denotes the desired 32-nt target sequence downstream of a 5’-CN-3’ PAM, and [N'32] denotes the reverse complement. Sequences in italics correspond to overhangs with the flanking CRISPR repeats.	11a	See Box 1.
	VchCAST_spacer_fw, Oligo-2	TTCAC(N'-32)G
	VchCAST_spacer1/2_fw	ATAAC(N1-32)GTGAACTGCCGAGTAGG	For ligating oligoduplexes encoding two spacer sequences, N1 and N2, into BsaI-digested entry vector to generate a new VchCAST CRISPR array. [N32-1] denotes the first desired 32-nt target sequence, and [N32-2] denotes the second 32-nt target sequence; [N’32-1] and [N’32-2] represent the reverse complements. Sequences in italics correspond to overhangs with the flanking CRISPR repeats, and the und…	11b	See Box 1.
	VchCAST_spacer1/2_rv	CGGCAGTTCAC(N1'-32)G
	VchCAST_spacer2/2_fw	TAGCTGATAAC(N2-32)G
	VchCAST_spacer2/2_rv	TTCAC(N2'-32)GTTATCAGCTACCTACT
	oSL1315	GTCAATTGTGCAAGTTTCAGG	For confirming crRNAs via Sanger sequencing	23
	VchCAST_cargo_fw	CTAAACTTCAGTAAGTTTACGACATTTTCCTCGAG(N-Anneal)	To amplify custom transposon payloads via PCR for cloning into digested pSL1142 using Gibson assembly. [N-anneal] refer to primer binding sites specific to the desired payload sequence, whereas sequences in italics represent homology arms for Gibson assembly.	24A, iv	These primers are designed for pSL1142 with full length transposon ends and digestion with ShoI / PstI. The Gibson overlap sequences (italics) should be modified, as needed, for use with other vector constructs and digestion sites.
	VchCAST_cargo_rv	TTTGTGAATCGAGTATTTCAGCAAAACTACTGCAG(N-Anneal)
	VchCAST_RE_fw1	TCAGGCATTTGTTGTTGATACAACCATAAAATGATAATTACAC	For modifying and truncating the VchCAST transposon right end sequence in pSL1142 using double restriction digestion and ligation of two oligoduplex pairs.	24B, iv
	VchCAST_RE_rv1	CCATAAATTGATAATTATCACACCCATC
	VchCAST_RE_fw2	TCGAGATGGGTGTGATAATTATCAATTTATGGGTGTAATT
	VchCAST_RE_rv2	ATCATTTTATGGTTGTATCAACAACAAATGCC
	oSL1659	TATCAACGGTGGTATATCCAGTGA	For confirming right end truncations via Sanger sequencing	24B, vii
	oSL2744	GAGAGCGAGATTCTCCGC	PCR primer pair to probe for successful curing of pSC101* and pCDF vector backbones.	39A, vii
	oSL2745	CCGGATCAAAGAGTTCCTCC
	oSL3365	AAGCCCTGCAAAGTAAACTGG	PCR primer pair to probe for successful curing of pBBR1 vector backbones.	39B, vi
	oSL3367	GTTGTGCCCAGTCATAGCC
	PRL	GAAGTTTAGACCATGAAGAGGCA	Exemplary primer pair to amplify T-RL integration products for E. coli target-13 (tktB-ypfG locus) by PCR/qPCR.	45A, ii; 45B, ii	See Fig. 5 for schematic of primer pair choices.
	PG3	CTTTGGCTTTACCGCCGAG
	PLR	GGTTGTTTTGTGGTTAAGTTGCT	Exemplary primer pair to amplify T-LR integration products for E. coli target-13 (tktB-ypfG locus) by PCR/qPCR.	45A, ii; 45B, ii	See Fig. 5 for schematic of primer pair choices.
	PG3	CTTTGGCTTTACCGCCGAG
	PG1	CATGCAGTATTCCAGGACTC	Exemplary primer pair to amplify a genomic reference locus by PCR/qPCR.	45A, ii; 45B, ii	Amplifies the E. coli rssA locus. This is used as a benchmark for PCR or for normalization purposes to calculate integration efficiency with qPCR. This reference primer pair should be redesign for non-E. coli hosts.
	PG2	GGAGAGCAAATCTTGTTGC
	PG4	CAATTGTCGGGATGACGGG	Examplary external-external primer pair to probe for clonal transposon insertions at E. coli target-13 (tktB-ypfG locus) by PCR.	45A, ii; 45B, ii
	PG5	TGATGAGAAATCGCGTGAACT

## Sheet: Supplementary Table 3
	Gelsinger et al.
	Supplementary Table 3 | Restriction digest sites on plasmids for cloning.
	Restriction Sites on Plasmids
	Plasmid ID	Spacer	Transposon Right End	Transposon Payload	Promoter	Vector Backbone	Plasmid Sequence
	pSL1142	BsaI	Bsu36I/XhoI	XhoI/PstI	HindIII/SalI	SalI/KpnI	CATTTATATTCCCCAGAACATCAGGTTAATGGCGTTTTTGATGTCATTTTCGCGGTGGCTGAGATCAGCCACTTCTTCCCCGATAACGGAGACCGGCACACTGGCCATATCGGTGGTCATCATGCGCCAGCTTTCATCCCCGATATGCACCACCGGGTAAAGTTCACGGGAGACTTTATCTGACAGCAGACGTGCACTGGCCAGGGGGATCACCATCCGTCGCCCCGGCGTGTCAATAATATCACTCTGTACATCCACAAACAGACGATAACGGCTCTCTCTTTTATAGGTGTAAACCTTAAACTGCCGTACGTATAGGCTGCGCAACTGTTGGGAAGGGCGATCGGTGCGGGCCTCTTCGCTATTACGCCAGCTGGCGAAAGGGGGATGTGCTGCAAG…
	pSL1425	BsaI	Bsu36I/XhoI	XhoI/PstI	HindIII/SalI	SalI/KpnI	GACGGATCGGGAGATCTCCCGATCCCCTATGGTGCACTCTCAGTACAATCTGCTCTGATGCCGCATAGTTAAGCCAGTATCTGCTCCCTGCTTGTGTGTTGGAGGTCGCTGAGTAGTGCGCGAGCAAAATTTAAGCTACAACAAGGCAAGGCTTGACCGACAATTGCATGAAGAATCTGCTTAGGGTTAGGCGTTTTGCGCTGCTTCGCGATGTACGGGCCAGATATACGCGTTGACATTGATTATTGACTAGTTATTAATAGTAATCAATTACGGGGTCATTAGTTCATAGCCCATATATGGAGTTCCGCGTTACATAACTTACGGTAAATGGCCCGCCTGGCTGACCGCCCAACGACCCCCGCCCATTGACGTCAATAATGACGTATGTTCCCATAG…
	pSL1521	BsaI	Bsu36I/XhoI	XhoI/PstI	HindIII/SalI	SalI/KpnI	GACGGATCGGGAGATCTCCCGATCCCCTATGGTCGACTCTCAGTACAATCTGCTCTGATGCCGCATAGTTAAGCCAGTATCTGCTCCCTGCTTGTGTGTTGGAGGTCGCTGAGTAGTGCGCGAGCAAAATTTAAGCTACAACAAGGCAAGGCTTGACCGACAATTGCATGAAGAATCTGCTTAGGGTTAGGCGTTTTGCGCTGCTTCGCGATGTACGGGCCAGATATACGCGAGGGCCTATTTCCCATGATTCCTTCATATTTGCATATACGATACAAGGCTGTTAGAGAGATAATTAGAATTAATTTGACTGTAAACACAAAGATATTAGTACAAAATACGTGACGTAGAAAGTAATAATTTCTTGGGTAGTTTGCAGTTTTAAAATTATGTTTTAAA…
	pSL1765	BsaI	Bsu36I/XhoI	XhoI/PstI	HindIII/SalI	SalI/KpnI	GACGGATCGGGAGATCTCCCGATCCCCTATGGTCGACTCTCAGTACAATCTGCTCTGATGCCGCATAGTTAAGCCAGTATCTGCTCCCTGCTTGTGTGTTGGAGGTCGCTGAGTAGTGCGCGAGCAAAATTTAAGCTACAACAAGGCAAGGCTTGACCGACAATTGCATGAAGAATCTGCTTAGGGTTAGGCGTTTTGCGCTGCTTCGCGATGTACGGGCCAGATATACGCGAGGGCCTATTTCCCATGATTCCTTCATATTTGCATATACGATACAAGGCTGTTAGAGAGATAATTAGAATTAATTTGACTGTAAACACAAAGATATTAGTACAAAATACGTGACGTAGAAAGTAATAATTTCTTGGGTAGTTTGCAGTTTTAAAATTATGTTTTAAA…
	pSL1777	BsaI	NA	NA	HindIII/SalI	SalI/KpnI	CTTCGGAAAAAGAGTTGGTAGCTCTTGATCCGGCAAACAAACCACCGCTGGTAGCGGTGGTTTTTTTGTTTGCAAGCAGCAGATTACGCGCAGAAAAAAAGGATCTCAAGAAGATCCTTTGATCTTTTCTACGGGGTCTGACGCTCAGTGGAACGAAAACTCACGTTAAGGGATTTTGGTCATGAGATTATCAAAAAGGATCTTCACCTAGATCCTTTTAAATTAAAAATGAAGTTTTAAATCAATCTAAAGTATATATGAGTAAACTTGGTCTGACAGTTACCAATGCTTAATCAGTGAGGCACCTATCTCAGCGATCTGTCTATTTCGTTCATCCATAGTTGCCTGACTCCCCGTCGTGTAGATAACTACGATACGGGAGGGCTTACCATCTGGCCC…
	pSL1119	NA	HindIII/XhoI	XhoI/PstI	NA	HindIII/KpnI	CTTCGGAAAAAGAGTTGGTAGCTCTTGATCCGGCAAACAAACCACCGCTGGTAGCGGTGGTTTTTTTGTTTGCAAGCAGCAGATTACGCGCAGAAAAAAAGGATCTCAAGAAGATCCTTTGATCTTTTCTACGGGGTCTGACGCTCAGTGGAACGAAAACTCACGTTAAGGGATTTTGGTCATGAGATTATCAAAAAGGATCTTCACCTAGATCCTTTTAAATTAAAAATGAAGTTTTAAATCAATCTAAAGTATATATGAGTAAACTTGGTCTGACAGTTACCAATGCTTAATCAGTGAGGCACCTATCTCAGCGATCTGTCTATTTCGTTCATCCATAGTTGCCTGACTCCCCGTCGTGTAGATAACTACGATACGGGAGGGCTTACCATCTGGCCC…
